# Supplementary material for: Electrospinning of a Copolymer PVDF-co-HFP Solved in DMF/Acetone: Explicit Relations among Viscosity, Polymer Concentration, DMF/Acetone Ratio and Mean Nanofiber Diameter
Source: MDPI journal article supplement (doi:10.3390/polym13193418), 2021-10-05
Supplement: s1 [file s1]

**experiments**

|                        | DMF:AC 1:0       | DMF:AC 4:1       | DMF:AC 2:1       | DMF:AC 1:1       | DMF:AC 1:2       |
|------------------------|------------------|------------------|------------------|------------------|------------------|
| Concentration<br>wt. % | eta exp<br>mPa.s |
| 8                      | 50,35            | 38,5             | 36,1             | 23,5             | 18,9             |
| 10                     | 98,47            | 69,4             | 53,6             | 45,8             | 35               |
| 12                     | 172,21           | 129              | 107              | 82               | 63               |
| 13                     | 228,52           |                  |                  |                  |                  |
| 15                     | 397,41           | 314              | 248              | 182              | 141              |
| 17                     | 684,48           |                  |                  |                  |                  |
| 18                     | 897,12           | 673,2            | 537              | 406              | 303              |
| 20                     | 1497,85          |                  |                  |                  |                  |
| 21                     | 1950,23          | 1429             | 1117             | 865              | 669              |
| 23                     | 3195,85          |                  |                  |                  |                  |
| 24                     | 4013,25          | 3059             | 2470             | 1966             |                  |
| 25                     | 5034,43          |                  |                  |                  |                  |
| 26                     | 6425,25          |                  |                  |                  |                  |
| 27                     | 8021,75          | 6355             |                  |                  |                  |

## experiments

|                       | DMF:AC 1:0 | DMF:AC 4:1 | DMF:AC 2:1 | DMF:AC 1:1 | DMF:AC 1:2 |
|-----------------------|------------|------------|------------|------------|------------|
| Concentration<br>wt.% | dia<br>nm  | dia<br>nm  | dia<br>nm  | dia<br>nm  | dia<br>nm  |
| 8                     |            | 99         | 106        | 126        | 210        |
| 10                    |            | 123        | 121        | 167        | 360        |
| 12                    |            | 156        | 164        | 278        | 380        |
| 15                    | 116        | 197        | 252        | 377        | 505        |
| 18                    | 171        | 298        | 414        | 489        | 685        |
| 21                    | 260        | 430        | 510        | 630        | 1123       |
| 24                    | 389        | 497        | 628        | 1295       | 3485       |
| 27                    | 518        | 596        |            | 1440       |            |
